# Supplementary material
Source: PubMed Central journal article supplement (PMC3025281)
Supplement: pnas_0606835104_1.pdf [file pnas_0606835104_1.pdf]

**Table 1. Clinical data of the MS and control cases used in this study**

|    | Case        | Sex | Age, years | PMD, hours | Disease duration, years | Cause of death                                            | Course | Lesions analyzed |                |                |                |      |
|----|-------------|-----|------------|------------|-------------------------|-----------------------------------------------------------|--------|------------------|----------------|----------------|----------------|------|
|    |             |     |            |            |                         |                                                           |        | Active           | Chronic active | Chronic silent | Shadow plaques | NAWM |
| MS |             |     |            |            |                         |                                                           |        |                  |                |                |                |      |
|    | <b>MS47</b> | F   | 66         | 17         | 34                      | Multiple sclerosis                                        | SP     |                  | 1              |                |                |      |
|    | <b>MS49</b> | M   | 75         | 8          | 38                      | Aspiration pneumonia, cerebrovascular accident, MS        | RR     |                  | 1              |                |                |      |
|    | <b>MS54</b> | F   | 69         | 11         | 31                      | Acute pyelonephritis, hydronephrosis, MS                  | PP     |                  |                |                | 1              |      |
|    | <b>MS55</b> | F   | 47         | 15         | 32                      | Pneumonia                                                 | SP     | 1                |                |                |                | 1    |
|    | <b>MS56</b> | M   | 63         | 11         | 39                      | Pneumonia, MS                                             | SP     |                  |                |                |                | 1    |
|    | <b>MS57</b> | F   | 77         | 9          | 31                      | General deterioration, lung infection, treatment withheld | PP     |                  |                | 2              | 1              | 1    |
|    | <b>MS58</b> | F   | 51         | 15         | 21                      | MS                                                        | SP     | 1                |                |                |                | 1    |
|    | <b>MS74</b> | F   | 64         | 7          | 36                      | Gastrointestinal bleed/obstruction, aspiration pneumonia  | SP     | 1                | 1              |                |                |      |

|                |   |    |    |     |                                             |    | Lesions analyzed |   |  |   |   |
|----------------|---|----|----|-----|---------------------------------------------|----|------------------|---|--|---|---|
| <b>MS79</b>    | F | 49 | 7  | 21  | Bronchopneumonia<br>, MS                    | SP | 3                | 2 |  |   | 1 |
| <b>MS92</b>    | F | 37 | 26 | 17  | MS                                          | SP | 1                | 1 |  |   |   |
| <b>MS100</b>   | M | 46 | 7  | 8   | Pneumonia                                   | SP |                  | 1 |  |   |   |
| <b>MS106</b>   | F | 39 | 18 | 21  | Bronchopneumonia                            | PP |                  | 1 |  |   |   |
| <b>MS107</b>   | M | 38 | 19 | >16 | Aspiration<br>pneumonia,<br>pulmonary edema | RP | 1                |   |  | 1 |   |
| <b>MS127</b>   | M | 51 | 21 | 10  | MS,<br>bronchopneumonia                     | SP | 1                | 1 |  |   |   |
| <b>MS136</b>   | M | 50 | 10 | 9   | Respiratory failure,<br>sepsis, MS          | SP | 2                | 2 |  |   |   |
| <b>MS153</b>   | F | 50 | 12 | NS  | MS                                          | SP |                  | 1 |  |   |   |
| <b>MS154</b>   | F | 34 | 12 | 9   | Pneumonia                                   | SP | 1                | 1 |  |   |   |
| <b>Control</b> |   |    |    |     |                                             |    |                  |   |  |   |   |
| <b>C20</b>     | F | 84 | 24 |     | Congestive cardiac<br>failure               |    |                  |   |  |   |   |
| <b>C05</b>     | F | 95 | 10 |     | Bronchopneumonia                            |    |                  |   |  |   |   |
| <b>1026</b>    | M | 44 | NS |     | Cirrhose                                    |    |                  |   |  |   |   |
| <b>1152</b>    | M | 27 | NS |     | Embolie<br>pulmonaire                       |    |                  |   |  |   |   |
| <b>1154</b>    | F | 43 | NS |     | Overdose                                    |    |                  |   |  |   |   |

PMD, postmortem delay; NS, not specified; PP, primary progressive; SP, secondary progressive; RR, relapsing-remitting; RP, relapsing progressive.
